# Supplementary material for: Establishing Infodemic Management in Germany: A Framework for Social Listening and Integrated Analysis to Report Infodemic Insights at the National Public Health Institute
Source: PubMed Central journal article supplement (PMC10273031; doi:10.2196/43646), 2023-06-01

## Multimedia Appendix 2.

**Supplemental Figure 1. Taxonomy to systematically monitor keywords in conversations related to public health issue X within thematic categories relevant to public health responses.**  
(German version; English version as Figure 1).

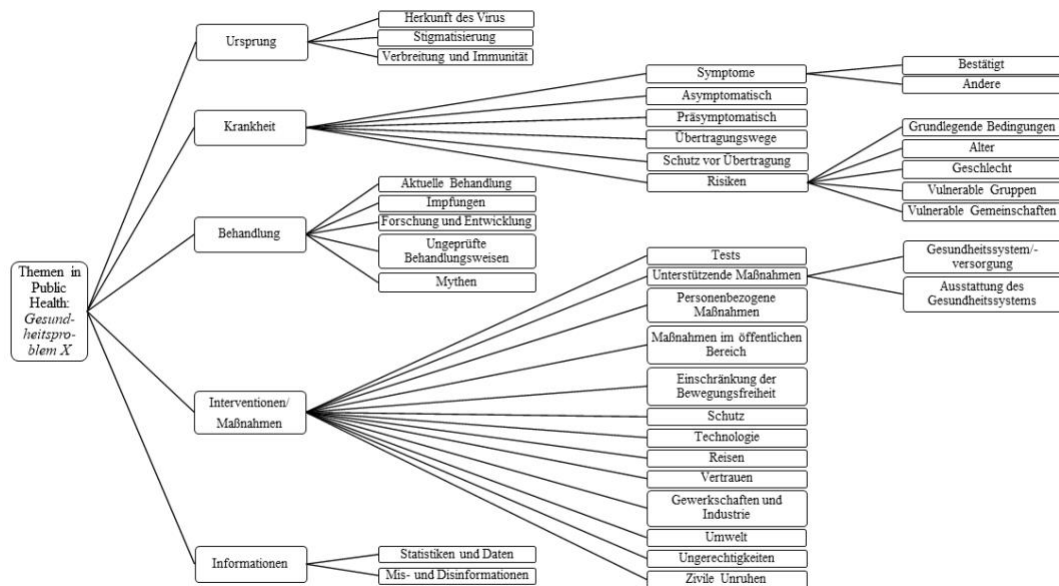

Supplement: infodemiology_v3i1e43646_app2.pdf [file infodemiology_v3i1e43646_app2.pdf]
